# Supplementary material
Source: Elsevier journal article supplement (https://www.sciencedirect.com/science/article/pii/S0034935620300165)
Supplement: mmc1 [file S0034935620300165:mmc1.docx]

**- ANEXO I.**

**CONSENTIMIENTO INFORMADO PARA LA REALIZACION DE TEST SENSITIVOS CUANTITATIVOS**

Mi médico le ha indicado la realización de un estudio sensitivo cuantitativo (*Quantitative Sensory Testing* en inglés) para explorar las fibras nerviosas de pequeño calibre relacionadas con la percepción del dolor, así como la integridad de todo el sistema nervioso implicado en la percepción y modulación del dolor.

He sido informado de que la prueba será realizada por un personal sanitario entrenado (médico o enfermera) y su duración aproximada es de 1 hora (30 a 90 minutos).

Se trata de una prueba no invasiva (no incluye pinchazos). Se basa en aplicar pequeñas sondas que transmiten estímulos como tacto, presión y temperatura (frío/calor) en distintas zonas del cuerpo, de forma que nos informe de su capacidad para percibir estos estímulos y saber si le resultan dolorosos.

Los dispositivos están calibrados de forma que ninguno de los estímulos pueda ser peligroso para el paciente en ningún caso. No obstante, alguno de los estímulos sí que pueden resultar ligeramente molestos, si bien su duración siempre va a ser menor de 1 ó 2 segundos.

Comprendo que los resultados de estas pruebas pueden ayudar a entender la naturaleza de mi dolor crónico, valorar la respuesta a los tratamientos pautados e incluso elegir de entrada el tratamiento más adecuado.

Se me ha indicado que la prueba no precisa ayuno y puedo continuar con mi actividad habitual (conducir o trabajar) tras su realización.

El personal que realiza la prueba ha resuelto todas las dudas que le les he planteado.

Por tanto, **DOY MI CONSENTIMIENTO** para que me realicen los Test Sensitivos Cuantitativos.

Firma del Paciente o Representante legal* Firma del Médico

D/Dñª___________________ Dr/a. __________

_______________________ _____________________

(*Nombre, apellidos y DNI del representante legal en caso de incapacidad del paciente con indicación del grado de parentesco: padre, madre, hijo/a, esposo/a, hermano/a, tutor.)

Madrid, a ____ de ______________ de 2___

# REVOCACIÓN O DENEGACIÓN DEL CONSENTIMIENTO INFORMADO

Revoco el consentimiento prestado para la realización de los Test Sensitivos Cuantitativos. No consiento que me sea realizado este estudio.

Firma del Paciente o Representante legal* Firma del Médico

D/Dñª________________________ Dr/a. _________

_______________________ _____________________

Madrid, a ____ de ______________ de 2____
